# Supplementary material for: Metabiotics Signature through Genome Sequencing and In Vitro Inhibitory Assessment of a Novel Lactococcus lactis Strain UTNCys6-1 Isolated from Amazonian Camu-Camu Fruits
Source: MDPI journal article supplement (doi:10.3390/ijms24076127), 2023-03-24
Supplement: s1 [file s1]

# Metabiotics Signature through Genome Sequencing and In Vitro Inhibitory Assessment of a Novel *Lactococcus lactis* Strain UTNCys6-1 Isolated from Amazonian Camu-Camu Fruits

Gabriela N. Tenea

Biofood and Nutraceuticals Research and Development Group, Faculty of Engineering in Agricultural and Environmental Sciences, Universidad Técnica del Norte, Av. 17 de Julio s-21, Barrio El Olivo, Ibarra 100150, Ecuador; gntenea@utn.edu.ec or gtenea@hotmail.com

**Table S1.** De novo assembly summary

| Assembly Method               | SPAdes 3.13.0 |
|-------------------------------|---------------|
| Contigs                       | 7             |
| Total contig bases            | 2,331,682     |
| N50                           | 1,520,392     |
| GC content(%)                 | 34.88         |
| Estimated genome size<br>(bp) | 2,226,248     |
| Sequencing depth              | 142           |

Contigs: The number of contigs assembled

Total bases of contigs : The total length of contigs

N50 : 50% of all contig bases come from contigs longer than this value

GC content: The percentage of guanine-cytosine base pairs

Genome size: The total of the genome in bp

Sequencing Depth : Average mapping depth

**Table S2.** Summary of Prophage regions identified in the UTNCys6-1 genome

| Conti<br>g | Regio<br>n | Regio<br>n<br>length | Completeness | Score | # Total<br>proteins | Region<br>positio<br>n      | Most common<br>Phage                      | GC%   |
|------------|------------|----------------------|--------------|-------|---------------------|-----------------------------|-------------------------------------------|-------|
| 1          | 1          | 10.8<br>kb           | incomplete   | 20    | 17                  | 73840-<br>84652             | PHAGE_Lactoc_bIL<br>286_NC_002667(3)      | 34.30 |
| 1          | 2          | 18.7<br>kb           | incomplete   | 30    | 14                  | 116820<br>6-<br>118697<br>8 | PHAGE_Lactoc_TP<br>901_1_NC_002747(2<br>) | 35.14 |
| 2          | 1          | 6.4 kb               | incomplete   | 20    | 7                   | 367721-<br>374207           | PHAGE_Paenib_Ye<br>rffej_NC_048714(1)     | 36.09 |
| 3          | 1          | 20.7<br>kb           | incomplete   | 20    | 30                  | 134918-<br>155691           | PHAGE_Lactob_bIL<br>3010_NC_002669(8)     | 40.79 |

Legend: region: the number assigned to the region; region length: the length of the sequence in that region; completeness: a prediction of whether the region contains a intact or incomplete prophage based on the criteria: intact (score > 90%); questionable (score 70-90); incomplete (score < 70%); score: the score of the region based on the mentioned criteria; # total proteins: the number of ORFs present in the region; Region position: the start and end positions of the region on the bacterial chromosome; Most common phage: the phages (s) with the highest number of proteins most similar to those in the region; GC%: the percentage of GC nucleotides of the region.

**Table S3.** Genomic islands detected in the UTNCys6-1 genome

| Island start | Island end | Length | Method                           | Gene ID | Locus        | Gene start | Gene end | Strand | Product                                                      |
|--------------|------------|--------|----------------------------------|---------|--------------|------------|----------|--------|--------------------------------------------------------------|
| 591735       | 643354     | 51619  | Predicted by at least one method |         | Cys6-1_00136 | 591735     | 592766   | 1      | hypothetical protein                                         |
| 591735       | 643354     | 51619  | Predicted by at least one method | icaA    | Cys6-1_00137 | 592771     | 593991   | 1      | Poly-beta-1,6-N-acetyl-D-glucosamine synthase                |
| 591735       | 643354     | 51619  | Predicted by at least one method |         | Cys6-1_00138 | 593994     | 594254   | 1      | hypothetical protein                                         |
| 591735       | 643354     | 51619  | Predicted by at least one method | icaB    | Cys6-1_00139 | 594264     | 595157   | 1      | Poly-beta-1,6-N-acetyl-D-glucosamine N-deacetylase           |
| 591735       | 643354     | 51619  | Predicted by at least one method |         | Cys6-1_00140 | 595184     | 596638   | 1      | hypothetical protein                                         |
| 591735       | 643354     | 51619  | Predicted by at least one method | brnQ    | Cys6-1_00141 | 596716     | 598086   | -1     | Branched-chain amino acid transport system 2 carrier protein |
| 591735       | 643354     | 51619  | Predicted by at least one method | yjdJ    | Cys6-1_00142 | 598323     | 598595   | -1     | putative protein YjdJ                                        |
| 591735       | 643354     | 51619  | Predicted by at least one method |         | Cys6-1_00143 | 598595     | 598867   | -1     | hypothetical protein                                         |
| 591735       | 643354     | 51619  | Predicted by at least one method | nisZ    | Cys6-1_00144 | 600280     | 600453   | 1      | Lantibiotic nisin-Z                                          |
| 591735       | 643354     | 51619  | Predicted by at least one method | nisB    | Cys6-1_00145 | 600561     | 603542   | 1      | Nisin biosynthesis protein NisB                              |
| 591735       | 643354     | 51619  | Predicted by at least one method | msbA    | Cys6-1_00146 | 603553     | 605355   | 1      | Lipid A export ATP-binding/permease protein MsbA             |
| 591735       | 643354     | 51619  | Predicted by at least one method | nisC    | Cys6-1_00147 | 605348     | 606592   | 1      | Nisin biosynthesis protein NisC                              |
| 591735       | 643354     | 51619  | Predicted by at least one method | nisI    | Cys6-1_00148 | 606589     | 607326   | 1      | Nisin immunity protein                                       |
| 591735       | 643354     | 51619  | Predicted by at least one method | nisP    | Cys6-1_00149 | 607328     | 609376   | 1      | Nisin leader peptide-processing serine protease NisP         |
| 591735       | 643354     | 51619  | Predicted by at least one method | arlR_1  | Cys6-1_00150 | 609445     | 610131   | 1      | Response regulator ArlR                                      |

|        |        |       |                                  |           |              |        |        |    |                                                        |
|--------|--------|-------|----------------------------------|-----------|--------------|--------|--------|----|--------------------------------------------------------|
| 591735 | 643354 | 51619 | Predicted by at least one method | sasA_1    | Cys6-1_00151 | 610124 | 611467 | 1  | Adaptive-response sensory-kinase SasA                  |
| 591735 | 643354 | 51619 | Predicted by at least one method | yxlF      | Cys6-1_00152 | 611566 | 612243 | 1  | putative ABC transporter ATP-binding protein YxlF      |
| 591735 | 643354 | 51619 | Predicted by at least one method |           | Cys6-1_00153 | 612245 | 612973 | 1  | hypothetical protein                                   |
| 591735 | 643354 | 51619 | Predicted by at least one method |           | Cys6-1_00154 | 612960 | 613604 | 1  | hypothetical protein                                   |
| 591735 | 643354 | 51619 | Predicted by at least one method |           | Cys6-1_00155 | 614738 | 615448 | 1  | hypothetical protein                                   |
| 591735 | 643354 | 51619 | Predicted by at least one method |           | Cys6-1_00156 | 615493 | 616548 | 1  | hypothetical protein                                   |
| 591735 | 643354 | 51619 | Predicted by at least one method | bcsA      | Cys6-1_00157 | 616603 | 618582 | 1  | Cellulose synthase catalytic subunit [UDP-forming]     |
| 591735 | 643354 | 51619 | Predicted by at least one method | degA_1    | Cys6-1_00158 | 618679 | 619635 | -1 | HTH-type transcriptional regulator DegA                |
| 591735 | 643354 | 51619 | Predicted by at least one method | scrB      | Cys6-1_00159 | 619632 | 621050 | -1 | Sucrose-6-phosphate hydrolase                          |
| 591735 | 643354 | 51619 | Predicted by at least one method |           | Cys6-1_00160 | 621228 | 623180 | 1  | hypothetical protein                                   |
| 591735 | 643354 | 51619 | Predicted by at least one method | gmuE_1    | Cys6-1_00161 | 623193 | 624065 | 1  | Putative fructokinase                                  |
| 591735 | 643354 | 51619 | Predicted by at least one method | hsrA_1    | Cys6-1_00162 | 624527 | 625894 | -1 | putative transport protein HsrA                        |
| 591735 | 643354 | 51619 | Predicted by at least one method | ybbH_1    | Cys6-1_00163 | 625942 | 626763 | -1 | putative HTH-type transcriptional regulator YbbH       |
| 591735 | 643354 | 51619 | Predicted by at least one method | rbsK/rbiA | Cys6-1_00164 | 627100 | 627627 | 1  | Bifunctional ribokinase/ribose-5-phosphate isomerase A |
| 591735 | 643354 | 51619 | Predicted by at least one method | iolU_1    | Cys6-1_00165 | 627600 | 628577 | 1  | scyllo-inositol 2-dehydrogenase (NADP(+)) IolU         |
| 591735 | 643354 | 51619 | Predicted by at least one method |           | Cys6-1_00166 | 628823 | 629308 | -1 | hypothetical protein                                   |
| 591735 | 643354 | 51619 | Predicted by at least one method |           | Cys6-1_00167 | 629667 | 630503 | 1  | hypothetical protein                                   |
| 591735 | 643354 | 51619 | Predicted by at least one method |           | Cys6-1_00168 | 631207 | 631494 | 1  | hypothetical protein                                   |

|         |         |       |                                  |        |              |         |         |    |                                                                     |
|---------|---------|-------|----------------------------------|--------|--------------|---------|---------|----|---------------------------------------------------------------------|
| 591735  | 643354  | 51619 | Predicted by at least one method | hin    | Cys6-1_00169 | 631753  | 632307  | -1 | DNA-invertase hin                                                   |
| 591735  | 643354  | 51619 | Predicted by at least one method |        | Cys6-1_00170 | 632569  | 633021  | -1 | hypothetical protein                                                |
| 591735  | 643354  | 51619 | Predicted by at least one method |        | Cys6-1_00171 | 633484  | 634089  | -1 | hypothetical protein                                                |
| 591735  | 643354  | 51619 | Predicted by at least one method |        | Cys6-1_00172 | 634465  | 634656  | -1 | hypothetical protein                                                |
| 591735  | 643354  | 51619 | Predicted by at least one method | rhaS_1 | Cys6-1_00173 | 635546  | 636601  | -1 | HTH-type transcriptional activator RhaS                             |
| 591735  | 643354  | 51619 | Predicted by at least one method | xylP   | Cys6-1_00174 | 636752  | 638128  | 1  | Isoprimeverose transporter                                          |
| 591735  | 643354  | 51619 | Predicted by at least one method |        | Cys6-1_00175 | 638125  | 639375  | 1  | hypothetical protein                                                |
| 591735  | 643354  | 51619 | Predicted by at least one method |        | Cys6-1_00176 | 639392  | 640969  | 1  | hypothetical protein                                                |
| 591735  | 643354  | 51619 | Predicted by at least one method | bglK_1 | Cys6-1_00177 | 640970  | 641875  | 1  | Beta-glucoside kinase                                               |
| 591735  | 643354  | 51619 | Predicted by at least one method | bglA_1 | Cys6-1_00178 | 641897  | 643354  | 1  | 6-phospho-beta-glucosidase BglA                                     |
| 1201794 | 1211161 | 9367  | Predicted by at least one method | topA   | Cys6-1_00700 | 1201794 | 1203926 | 1  | DNA topoisomerase 1                                                 |
| 1201794 | 1211161 | 9367  | Predicted by at least one method | trmFO  | Cys6-1_00701 | 1203998 | 1205341 | 1  | Methylenetetrahydrofolate--tRNA-(uracil-5-)-methyltransferase TrmFO |
| 1201794 | 1211161 | 9367  | Predicted by at least one method | xerS_1 | Cys6-1_00702 | 1205386 | 1206456 | -1 | Tyrosine recombinase XerS                                           |
| 1201794 | 1211161 | 9367  | Predicted by at least one method |        | Cys6-1_00703 | 1206937 | 1207224 | -1 | hypothetical protein                                                |
| 1201794 | 1211161 | 9367  | Predicted by at least one method | xerS_2 | Cys6-1_00704 | 1207307 | 1208362 | -1 | Tyrosine recombinase XerS                                           |
| 1201794 | 1211161 | 9367  | Predicted by at least one method |        | Cys6-1_00705 | 1209192 | 1209587 | -1 | hypothetical protein                                                |
| 1201794 | 1211161 | 9367  | Predicted by at least one method |        | Cys6-1_00706 | 1209825 | 1210631 | -1 | hypothetical protein                                                |
| 1201794 | 1211161 | 9367  | Predicted by at least one method |        | Cys6-1_00707 | 1210679 | 1211161 | -1 | hypothetical protein                                                |

|         |         |       |                                  |        |              |         |         |    |                                                              |
|---------|---------|-------|----------------------------------|--------|--------------|---------|---------|----|--------------------------------------------------------------|
| 1201794 | 1211161 | 9367  | Predicted by at least one method |        | Cys6-1_00708 | 1211151 | 1212827 | -1 | hypothetical protein                                         |
| 1223353 | 1228766 | 5413  | Predicted by at least one method |        | Cys6-1_00716 | 1223353 | 1225290 | -1 | hypothetical protein                                         |
| 1223353 | 1228766 | 5413  | Predicted by at least one method |        | Cys6-1_00718 | 1227591 | 1228766 | -1 | hypothetical protein                                         |
| 1223353 | 1228766 | 5413  | Predicted by at least one method |        | Cys6-1_00719 | 1228744 | 1230033 | -1 | hypothetical protein                                         |
| 1227591 | 1249990 | 22399 | Predicted by at least one method |        | Cys6-1_00718 | 1227591 | 1228766 | -1 | hypothetical protein                                         |
| 1227591 | 1249990 | 22399 | Predicted by at least one method |        | Cys6-1_00719 | 1228744 | 1230033 | -1 | hypothetical protein                                         |
| 1227591 | 1249990 | 22399 | Predicted by at least one method |        | Cys6-1_00720 | 1230092 | 1231324 | -1 | hypothetical protein                                         |
| 1227591 | 1249990 | 22399 | Predicted by at least one method |        | Cys6-1_00721 | 1231294 | 1231704 | -1 | hypothetical protein                                         |
| 1227591 | 1249990 | 22399 | Predicted by at least one method | purK_1 | Cys6-1_00722 | 1231724 | 1233001 | -1 | N5-carboxyaminoimidazole ribonucleotide synthase             |
| 1227591 | 1249990 | 22399 | Predicted by at least one method | ldcA   | Cys6-1_00723 | 1233123 | 1234070 | -1 | Murein tetrapeptide carboxypeptidase                         |
| 1227591 | 1249990 | 22399 | Predicted by at least one method | asnS_1 | Cys6-1_00724 | 1234089 | 1235087 | -1 | Asparagine--tRNA ligase                                      |
| 1227591 | 1249990 | 22399 | Predicted by at least one method | ubiE_2 | Cys6-1_00725 | 1235122 | 1235937 | -1 | Ubiquinone/menaquinone biosynthesis C-methyltransferase UbiE |
| 1227591 | 1249990 | 22399 | Predicted by at least one method |        | Cys6-1_00726 | 1236371 | 1237285 | 1  | hypothetical protein                                         |
| 1227591 | 1249990 | 22399 | Predicted by at least one method |        | Cys6-1_00727 | 1237441 | 1237962 | -1 | hypothetical protein                                         |
| 1227591 | 1249990 | 22399 | Predicted by at least one method |        | Cys6-1_00728 | 1237949 | 1238812 | -1 | hypothetical protein                                         |
| 1227591 | 1249990 | 22399 | Predicted by at least one method | ltrA   | Cys6-1_00729 | 1239244 | 1241043 | -1 | Group II intron-encoded protein LtrA                         |
| 1227591 | 1249990 | 22399 | Predicted by at least one method |        | Cys6-1_00730 | 1241581 | 1241979 | -1 | hypothetical protein                                         |
| 1227591 | 1249990 | 22399 | Predicted by at least one method |        | Cys6-1_00731 | 1242029 | 1242361 | -1 | hypothetical protein                                         |

|         |         |       |                                  |        |              |         |         |    |                                            |
|---------|---------|-------|----------------------------------|--------|--------------|---------|---------|----|--------------------------------------------|
| 1227591 | 1249990 | 22399 | Predicted by at least one method |        | Cys6-1_00732 | 1242539 | 1242628 | -1 | hypothetical protein                       |
| 1227591 | 1249990 | 22399 | Predicted by at least one method |        | Cys6-1_00733 | 1242659 | 1242979 | -1 | hypothetical protein                       |
| 1227591 | 1249990 | 22399 | Predicted by at least one method |        | Cys6-1_00734 | 1243368 | 1244282 | -1 | hypothetical protein                       |
| 1227591 | 1249990 | 22399 | Predicted by at least one method | hchA   | Cys6-1_00735 | 1244283 | 1244960 | -1 | Molecular chaperone Hsp31 and glyoxalase 3 |
| 1227591 | 1249990 | 22399 | Predicted by at least one method |        | Cys6-1_00736 | 1244957 | 1245274 | -1 | hypothetical protein                       |
| 1227591 | 1249990 | 22399 | Predicted by at least one method | ceo    | Cys6-1_00737 | 1245749 | 1246678 | -1 | N(5)-(carboxyethyl)ornithine synthase      |
| 1227591 | 1249990 | 22399 | Predicted by at least one method |        | Cys6-1_00738 | 1247055 | 1247606 | -1 | Stress response regulator gls24            |
| 1227591 | 1249990 | 22399 | Predicted by at least one method |        | Cys6-1_00739 | 1247627 | 1247815 | -1 | hypothetical protein                       |
| 1227591 | 1249990 | 22399 | Predicted by at least one method |        | Cys6-1_00740 | 1247825 | 1248385 | -1 | hypothetical protein                       |
| 1227591 | 1249990 | 22399 | Predicted by at least one method |        | Cys6-1_00741 | 1248415 | 1248654 | -1 | hypothetical protein                       |
| 1227591 | 1249990 | 22399 | Predicted by at least one method | dkgB   | Cys6-1_00742 | 1249148 | 1249990 | 1  | 2,5-diketo-D-gluconic acid reductase B     |
| 1621554 | 1640004 | 18450 | Predicted by at least one method | arlR_2 | Cys6-1_01063 | 1621554 | 1622246 | -1 | Response regulator ArlR                    |
| 1621554 | 1640004 | 18450 | Predicted by at least one method |        | Cys6-1_01064 | 1622402 | 1622932 | -1 | hypothetical protein                       |
| 1621554 | 1640004 | 18450 | Predicted by at least one method | rpmE2  | Cys6-1_01065 | 1623063 | 1623308 | -1 | 50S ribosomal protein L31 type B           |
| 1621554 | 1640004 | 18450 | Predicted by at least one method |        | Cys6-1_01066 | 1623464 | 1623928 | -1 | hypothetical protein                       |
| 1621554 | 1640004 | 18450 | Predicted by at least one method |        | Cys6-1_01067 | 1624010 | 1624372 | -1 | hypothetical protein                       |
| 1621554 | 1640004 | 18450 | Predicted by at least one method |        | Cys6-1_01068 | 1624857 | 1625387 | -1 | hypothetical protein                       |
| 1621554 | 1640004 | 18450 | Predicted by at least one method | ypbG   | Cys6-1_01069 | 1625448 | 1626284 | -1 | putative protein YpbG                      |

|         |         |       |                                  |  |              |         |         |    |                      |
|---------|---------|-------|----------------------------------|--|--------------|---------|---------|----|----------------------|
| 1621554 | 1640004 | 18450 | Predicted by at least one method |  | Cys6-1_01070 | 1626935 | 1627330 | 1  | hypothetical protein |
| 1621554 | 1640004 | 18450 | Predicted by at least one method |  | Cys6-1_01071 | 1627999 | 1628268 | -1 | hypothetical protein |
| 1621554 | 1640004 | 18450 | Predicted by at least one method |  | Cys6-1_01072 | 1628589 | 1628837 | 1  | hypothetical protein |
| 1621554 | 1640004 | 18450 | Predicted by at least one method |  | Cys6-1_01073 | 1629847 | 1630218 | 1  | hypothetical protein |
| 1621554 | 1640004 | 18450 | Predicted by at least one method |  | Cys6-1_01074 | 1630468 | 1630653 | -1 | hypothetical protein |
| 1621554 | 1640004 | 18450 | Predicted by at least one method |  | Cys6-1_01076 | 1630891 | 1631169 | -1 | hypothetical protein |
| 1621554 | 1640004 | 18450 | Predicted by at least one method |  | Cys6-1_01080 | 1632233 | 1633018 | -1 | hypothetical protein |
| 1621554 | 1640004 | 18450 | Predicted by at least one method |  | Cys6-1_01081 | 1633075 | 1633293 | -1 | hypothetical protein |
| 1621554 | 1640004 | 18450 | Predicted by at least one method |  | Cys6-1_01082 | 1633306 | 1633527 | -1 | hypothetical protein |
| 1621554 | 1640004 | 18450 | Predicted by at least one method |  | Cys6-1_01083 | 1633543 | 1634292 | -1 | hypothetical protein |
| 1621554 | 1640004 | 18450 | Predicted by at least one method |  | Cys6-1_01084 | 1634395 | 1635126 | -1 | hypothetical protein |
| 1621554 | 1640004 | 18450 | Predicted by at least one method |  | Cys6-1_01085 | 1635605 | 1635844 | -1 | hypothetical protein |
| 1621554 | 1640004 | 18450 | Predicted by at least one method |  | Cys6-1_01086 | 1635962 | 1636231 | 1  | hypothetical protein |
| 1621554 | 1640004 | 18450 | Predicted by at least one method |  | Cys6-1_01087 | 1636352 | 1636507 | 1  | hypothetical protein |
| 1621554 | 1640004 | 18450 | Predicted by at least one method |  | Cys6-1_01088 | 1636727 | 1637113 | 1  | hypothetical protein |
| 1621554 | 1640004 | 18450 | Predicted by at least one method |  | Cys6-1_01089 | 1637290 | 1637853 | 1  | hypothetical protein |
| 1621554 | 1640004 | 18450 | Predicted by at least one method |  | Cys6-1_01090 | 1637883 | 1637981 | -1 | hypothetical protein |
| 1621554 | 1640004 | 18450 | Predicted by at least one method |  | Cys6-1_01091 | 1637990 | 1638232 | -1 | hypothetical protein |



|         |         |       |                                  |        |              |         |         |    |                                       |
|---------|---------|-------|----------------------------------|--------|--------------|---------|---------|----|---------------------------------------|
| 1621554 | 1640004 | 18450 | Predicted by at least one method |        | Cys6-1_01092 | 1638204 | 1638407 | -1 | hypothetical protein                  |
| 1621554 | 1640004 | 18450 | Predicted by at least one method |        | Cys6-1_01093 | 1638870 | 1639016 | 1  | hypothetical protein                  |
| 1621554 | 1640004 | 18450 | Predicted by at least one method |        | Cys6-1_01094 | 1639230 | 1639535 | 1  | hypothetical protein                  |
| 1621554 | 1640004 | 18450 | Predicted by at least one method | xerD_2 | Cys6-1_01095 | 1639576 | 1640004 | 1  | Tyrosine recombinase XerD             |
| 2058525 | 2078210 | 19685 | Predicted by at least one method |        | Cys6-1_02054 | 2058525 | 2058848 | -1 | hypothetical protein                  |
| 2058525 | 2078210 | 19685 | Predicted by at least one method | bltD   | Cys6-1_02053 | 2058896 | 2059357 | -1 | Spermine/spermidine acetyltransferase |
| 2058525 | 2078210 | 19685 | Predicted by at least one method |        | Cys6-1_02052 | 2059556 | 2060062 | -1 | hypothetical protein                  |
| 2058525 | 2078210 | 19685 | Predicted by at least one method |        | Cys6-1_02051 | 2060154 | 2060486 | -1 | hypothetical protein                  |
| 2058525 | 2078210 | 19685 | Predicted by at least one method |        | Cys6-1_02050 | 2060615 | 2060941 | -1 | hypothetical protein                  |
| 2058525 | 2078210 | 19685 | Predicted by at least one method |        | Cys6-1_02049 | 2061513 | 2062094 | -1 | hypothetical protein                  |
| 2058525 | 2078210 | 19685 | Predicted by at least one method |        | Cys6-1_02048 | 2062142 | 2062678 | -1 | hypothetical protein                  |
| 2058525 | 2078210 | 19685 | Predicted by at least one method |        | Cys6-1_02047 | 2062708 | 2063601 | -1 | hypothetical protein                  |
| 2058525 | 2078210 | 19685 | Predicted by at least one method |        | Cys6-1_02046 | 2063613 | 2064455 | -1 | hypothetical protein                  |
| 2058525 | 2078210 | 19685 | Predicted by at least one method |        | Cys6-1_02045 | 2064464 | 2064790 | -1 | hypothetical protein                  |
| 2058525 | 2078210 | 19685 | Predicted by at least one method |        | Cys6-1_02044 | 2064777 | 2064968 | -1 | hypothetical protein                  |
| 2058525 | 2078210 | 19685 | Predicted by at least one method |        | Cys6-1_02043 | 2064952 | 2065215 | -1 | hypothetical protein                  |
| 2058525 | 2078210 | 19685 | Predicted by at least one method |        | Cys6-1_02042 | 2065212 | 2065454 | -1 | hypothetical protein                  |
| 2058525 | 2078210 | 19685 | Predicted by at least one method |        | Cys6-1_02041 | 2065486 | 2065764 | -1 | hypothetical protein                  |

|         |         |       |                                  |  |              |         |         |    |                      |
|---------|---------|-------|----------------------------------|--|--------------|---------|---------|----|----------------------|
| 2058525 | 2078210 | 19685 | Predicted by at least one method |  | Cys6-1_02040 | 2065767 | 2065991 | -1 | hypothetical protein |
| 2058525 | 2078210 | 19685 | Predicted by at least one method |  | Cys6-1_02039 | 2065988 | 2066506 | -1 | hypothetical protein |
| 2058525 | 2078210 | 19685 | Predicted by at least one method |  | Cys6-1_02038 | 2066516 | 2066683 | -1 | hypothetical protein |
| 2058525 | 2078210 | 19685 | Predicted by at least one method |  | Cys6-1_02037 | 2066747 | 2067451 | -1 | hypothetical protein |
| 2058525 | 2078210 | 19685 | Predicted by at least one method |  | Cys6-1_02036 | 2067627 | 2067821 | -1 | hypothetical protein |
| 2058525 | 2078210 | 19685 | Predicted by at least one method |  | Cys6-1_02035 | 2067972 | 2068568 | 1  | hypothetical protein |
| 2058525 | 2078210 | 19685 | Predicted by at least one method |  | Cys6-1_02034 | 2068562 | 2068795 | -1 | hypothetical protein |
| 2058525 | 2078210 | 19685 | Predicted by at least one method |  | Cys6-1_02033 | 2069427 | 2069585 | 1  | hypothetical protein |
| 2058525 | 2078210 | 19685 | Predicted by at least one method |  | Cys6-1_02032 | 2069698 | 2069928 | 1  | hypothetical protein |
| 2058525 | 2078210 | 19685 | Predicted by at least one method |  | Cys6-1_02031 | 2070140 | 2070559 | 1  | hypothetical protein |
| 2058525 | 2078210 | 19685 | Predicted by at least one method |  | Cys6-1_02030 | 2070730 | 2071164 | 1  | hypothetical protein |
| 2058525 | 2078210 | 19685 | Predicted by at least one method |  | Cys6-1_02029 | 2071259 | 2071462 | 1  | hypothetical protein |
| 2058525 | 2078210 | 19685 | Predicted by at least one method |  | Cys6-1_02028 | 2071585 | 2071986 | 1  | hypothetical protein |
| 2058525 | 2078210 | 19685 | Predicted by at least one method |  | Cys6-1_02027 | 2072200 | 2072433 | 1  | hypothetical protein |
| 2058525 | 2078210 | 19685 | Predicted by at least one method |  | Cys6-1_02026 | 2072512 | 2073630 | 1  | hypothetical protein |
| 2058525 | 2078210 | 19685 | Predicted by at least one method |  | Cys6-1_02025 | 2073712 | 2073918 | 1  | hypothetical protein |
| 2058525 | 2078210 | 19685 | Predicted by at least one method |  | Cys6-1_02024 | 2074236 | 2074589 | 1  | hypothetical protein |
| 2058525 | 2078210 | 19685 | Predicted by at least one method |  | Cys6-1_02023 | 2075389 | 2075796 | 1  | hypothetical protein |

|         |         |       |                                  |        |              |         |         |    |                                                              |
|---------|---------|-------|----------------------------------|--------|--------------|---------|---------|----|--------------------------------------------------------------|
| 2058525 | 2078210 | 19685 | Predicted by at least one method |        | Cys6-1_02022 | 2075896 | 2076414 | 1  | hypothetical protein                                         |
| 2058525 | 2078210 | 19685 | Predicted by at least one method |        | Cys6-1_02021 | 2076459 | 2076764 | 1  | hypothetical protein                                         |
| 2058525 | 2078210 | 19685 | Predicted by at least one method | xerD_3 | Cys6-1_02020 | 2077029 | 2078210 | 1  | Tyrosine recombinase XerD                                    |
| 591735  | 643354  | 51619 | IslandPath-DIMOB                 |        | Cys6-1_00136 | 591735  | 592766  | 1  | hypothetical protein                                         |
| 591735  | 643354  | 51619 | IslandPath-DIMOB                 | icaA   | Cys6-1_00137 | 592771  | 593991  | 1  | Poly-beta-1,6-N-acetyl-D-glucosamine synthase                |
| 591735  | 643354  | 51619 | IslandPath-DIMOB                 |        | Cys6-1_00138 | 593994  | 594254  | 1  | hypothetical protein                                         |
| 591735  | 643354  | 51619 | IslandPath-DIMOB                 | icaB   | Cys6-1_00139 | 594264  | 595157  | 1  | Poly-beta-1,6-N-acetyl-D-glucosamine N-deacetylase           |
| 591735  | 643354  | 51619 | IslandPath-DIMOB                 |        | Cys6-1_00140 | 595184  | 596638  | 1  | hypothetical protein                                         |
| 591735  | 643354  | 51619 | IslandPath-DIMOB                 | brnQ   | Cys6-1_00141 | 596716  | 598086  | -1 | Branched-chain amino acid transport system 2 carrier protein |
| 591735  | 643354  | 51619 | IslandPath-DIMOB                 | yjdJ   | Cys6-1_00142 | 598323  | 598595  | -1 | putative protein YjdJ                                        |
| 591735  | 643354  | 51619 | IslandPath-DIMOB                 |        | Cys6-1_00143 | 598595  | 598867  | -1 | hypothetical protein                                         |
| 591735  | 643354  | 51619 | IslandPath-DIMOB                 | nisZ   | Cys6-1_00144 | 600280  | 600453  | 1  | Lantibiotic nisin-Z                                          |
| 591735  | 643354  | 51619 | IslandPath-DIMOB                 | nisB   | Cys6-1_00145 | 600561  | 603542  | 1  | Nisin biosynthesis protein NisB                              |
| 591735  | 643354  | 51619 | IslandPath-DIMOB                 | msbA   | Cys6-1_00146 | 603553  | 605355  | 1  | Lipid A export ATP-binding/permease protein MsbA             |
| 591735  | 643354  | 51619 | IslandPath-DIMOB                 | nisC   | Cys6-1_00147 | 605348  | 606592  | 1  | Nisin biosynthesis protein NisC                              |
| 591735  | 643354  | 51619 | IslandPath-DIMOB                 | nisI   | Cys6-1_00148 | 606589  | 607326  | 1  | Nisin immunity protein                                       |
| 591735  | 643354  | 51619 | IslandPath-DIMOB                 | nisP   | Cys6-1_00149 | 607328  | 609376  | 1  | Nisin leader peptide-processing serine protease NisP         |
| 591735  | 643354  | 51619 | IslandPath-DIMOB                 | arlR_1 | Cys6-1_00150 | 609445  | 610131  | 1  | Response regulator ArlR                                      |

|        |        |       |                  |           |              |        |        |    |                                                        |
|--------|--------|-------|------------------|-----------|--------------|--------|--------|----|--------------------------------------------------------|
| 591735 | 643354 | 51619 | IslandPath-DIMOB | sasA_1    | Cys6-1_00151 | 610124 | 611467 | 1  | Adaptive-response sensory-kinase SasA                  |
| 591735 | 643354 | 51619 | IslandPath-DIMOB | yxlF      | Cys6-1_00152 | 611566 | 612243 | 1  | putative ABC transporter ATP-binding protein YxlF      |
| 591735 | 643354 | 51619 | IslandPath-DIMOB |           | Cys6-1_00153 | 612245 | 612973 | 1  | hypothetical protein                                   |
| 591735 | 643354 | 51619 | IslandPath-DIMOB |           | Cys6-1_00154 | 612960 | 613604 | 1  | hypothetical protein                                   |
| 591735 | 643354 | 51619 | IslandPath-DIMOB |           | Cys6-1_00155 | 614738 | 615448 | 1  | hypothetical protein                                   |
| 591735 | 643354 | 51619 | IslandPath-DIMOB |           | Cys6-1_00156 | 615493 | 616548 | 1  | hypothetical protein                                   |
| 591735 | 643354 | 51619 | IslandPath-DIMOB | bcsA      | Cys6-1_00157 | 616603 | 618582 | 1  | Cellulose synthase catalytic subunit [UDP-forming]     |
| 591735 | 643354 | 51619 | IslandPath-DIMOB | degA_1    | Cys6-1_00158 | 618679 | 619635 | -1 | HTH-type transcriptional regulator DegA                |
| 591735 | 643354 | 51619 | IslandPath-DIMOB | scrB      | Cys6-1_00159 | 619632 | 621050 | -1 | Sucrose-6-phosphate hydrolase                          |
| 591735 | 643354 | 51619 | IslandPath-DIMOB |           | Cys6-1_00160 | 621228 | 623180 | 1  | hypothetical protein                                   |
| 591735 | 643354 | 51619 | IslandPath-DIMOB | gmuE_1    | Cys6-1_00161 | 623193 | 624065 | 1  | Putative fructokinase                                  |
| 591735 | 643354 | 51619 | IslandPath-DIMOB | hsrA_1    | Cys6-1_00162 | 624527 | 625894 | -1 | putative transport protein HsrA                        |
| 591735 | 643354 | 51619 | IslandPath-DIMOB | ybbH_1    | Cys6-1_00163 | 625942 | 626763 | -1 | putative HTH-type transcriptional regulator YbbH       |
| 591735 | 643354 | 51619 | IslandPath-DIMOB | rbsK/rbiA | Cys6-1_00164 | 627100 | 627627 | 1  | Bifunctional ribokinase/ribose-5-phosphate isomerase A |
| 591735 | 643354 | 51619 | IslandPath-DIMOB | iolU_1    | Cys6-1_00165 | 627600 | 628577 | 1  | scyllo-inositol 2-dehydrogenase (NADP(+)) IolU         |
| 591735 | 643354 | 51619 | IslandPath-DIMOB |           | Cys6-1_00166 | 628823 | 629308 | -1 | hypothetical protein                                   |
| 591735 | 643354 | 51619 | IslandPath-DIMOB |           | Cys6-1_00167 | 629667 | 630503 | 1  | hypothetical protein                                   |
| 591735 | 643354 | 51619 | IslandPath-DIMOB |           | Cys6-1_00168 | 631207 | 631494 | 1  | hypothetical protein                                   |

|         |         |       |                  |        |              |         |         |    |                                                                     |
|---------|---------|-------|------------------|--------|--------------|---------|---------|----|---------------------------------------------------------------------|
| 591735  | 643354  | 51619 | IslandPath-DIMOB | hin    | Cys6-1_00169 | 631753  | 632307  | -1 | DNA-invertase hin                                                   |
| 591735  | 643354  | 51619 | IslandPath-DIMOB |        | Cys6-1_00170 | 632569  | 633021  | -1 | hypothetical protein                                                |
| 591735  | 643354  | 51619 | IslandPath-DIMOB |        | Cys6-1_00171 | 633484  | 634089  | -1 | hypothetical protein                                                |
| 591735  | 643354  | 51619 | IslandPath-DIMOB |        | Cys6-1_00172 | 634465  | 634656  | -1 | hypothetical protein                                                |
| 591735  | 643354  | 51619 | IslandPath-DIMOB | rhaS_1 | Cys6-1_00173 | 635546  | 636601  | -1 | HTH-type transcriptional activator RhaS                             |
| 591735  | 643354  | 51619 | IslandPath-DIMOB | xylP   | Cys6-1_00174 | 636752  | 638128  | 1  | Isoprimeverose transporter                                          |
| 591735  | 643354  | 51619 | IslandPath-DIMOB |        | Cys6-1_00175 | 638125  | 639375  | 1  | hypothetical protein                                                |
| 591735  | 643354  | 51619 | IslandPath-DIMOB |        | Cys6-1_00176 | 639392  | 640969  | 1  | hypothetical protein                                                |
| 591735  | 643354  | 51619 | IslandPath-DIMOB | bglK_1 | Cys6-1_00177 | 640970  | 641875  | 1  | Beta-glucoside kinase                                               |
| 591735  | 643354  | 51619 | IslandPath-DIMOB | bglA_1 | Cys6-1_00178 | 641897  | 643354  | 1  | 6-phospho-beta-glucosidase BglA                                     |
| 1201794 | 1211161 | 9367  | IslandPath-DIMOB | topA   | Cys6-1_00700 | 1201794 | 1203926 | 1  | DNA topoisomerase 1                                                 |
| 1201794 | 1211161 | 9367  | IslandPath-DIMOB | trmFO  | Cys6-1_00701 | 1203998 | 1205341 | 1  | Methylenetetrahydrofolate--tRNA-(uracil-5-)-methyltransferase TrmFO |
| 1201794 | 1211161 | 9367  | IslandPath-DIMOB | xerS_1 | Cys6-1_00702 | 1205386 | 1206456 | -1 | Tyrosine recombinase XerS                                           |
| 1201794 | 1211161 | 9367  | IslandPath-DIMOB |        | Cys6-1_00703 | 1206937 | 1207224 | -1 | hypothetical protein                                                |
| 1201794 | 1211161 | 9367  | IslandPath-DIMOB | xerS_2 | Cys6-1_00704 | 1207307 | 1208362 | -1 | Tyrosine recombinase XerS                                           |
| 1201794 | 1211161 | 9367  | IslandPath-DIMOB |        | Cys6-1_00705 | 1209192 | 1209587 | -1 | hypothetical protein                                                |
| 1201794 | 1211161 | 9367  | IslandPath-DIMOB |        | Cys6-1_00706 | 1209825 | 1210631 | -1 | hypothetical protein                                                |
| 1201794 | 1211161 | 9367  | IslandPath-DIMOB |        | Cys6-1_00707 | 1210679 | 1211161 | -1 | hypothetical protein                                                |

|         |         |       |                  |        |              |         |         |    |                                                              |
|---------|---------|-------|------------------|--------|--------------|---------|---------|----|--------------------------------------------------------------|
| 1201794 | 1211161 | 9367  | IslandPath-DIMOB |        | Cys6-1_00708 | 1211151 | 1212827 | -1 | hypothetical protein                                         |
| 1227591 | 1249990 | 22399 | IslandPath-DIMOB |        | Cys6-1_00718 | 1227591 | 1228766 | -1 | hypothetical protein                                         |
| 1227591 | 1249990 | 22399 | IslandPath-DIMOB |        | Cys6-1_00719 | 1228744 | 1230033 | -1 | hypothetical protein                                         |
| 1227591 | 1249990 | 22399 | IslandPath-DIMOB |        | Cys6-1_00720 | 1230092 | 1231324 | -1 | hypothetical protein                                         |
| 1227591 | 1249990 | 22399 | IslandPath-DIMOB |        | Cys6-1_00721 | 1231294 | 1231704 | -1 | hypothetical protein                                         |
| 1227591 | 1249990 | 22399 | IslandPath-DIMOB | purK_1 | Cys6-1_00722 | 1231724 | 1233001 | -1 | N5-carboxyaminoimidazole ribonucleotide synthase             |
| 1227591 | 1249990 | 22399 | IslandPath-DIMOB | ldcA   | Cys6-1_00723 | 1233123 | 1234070 | -1 | Murein tetrapeptide carboxypeptidase                         |
| 1227591 | 1249990 | 22399 | IslandPath-DIMOB | asnS_1 | Cys6-1_00724 | 1234089 | 1235087 | -1 | Asparagine--tRNA ligase                                      |
| 1227591 | 1249990 | 22399 | IslandPath-DIMOB | ubiE_2 | Cys6-1_00725 | 1235122 | 1235937 | -1 | Ubiquinone/menaquinone biosynthesis C-methyltransferase UbiE |
| 1227591 | 1249990 | 22399 | IslandPath-DIMOB |        | Cys6-1_00726 | 1236371 | 1237285 | 1  | hypothetical protein                                         |
| 1227591 | 1249990 | 22399 | IslandPath-DIMOB |        | Cys6-1_00727 | 1237441 | 1237962 | -1 | hypothetical protein                                         |
| 1227591 | 1249990 | 22399 | IslandPath-DIMOB |        | Cys6-1_00728 | 1237949 | 1238812 | -1 | hypothetical protein                                         |
| 1227591 | 1249990 | 22399 | IslandPath-DIMOB | ltrA   | Cys6-1_00729 | 1239244 | 1241043 | -1 | Group II intron-encoded protein LtrA                         |
| 1227591 | 1249990 | 22399 | IslandPath-DIMOB |        | Cys6-1_00730 | 1241581 | 1241979 | -1 | hypothetical protein                                         |
| 1227591 | 1249990 | 22399 | IslandPath-DIMOB |        | Cys6-1_00731 | 1242029 | 1242361 | -1 | hypothetical protein                                         |
| 1227591 | 1249990 | 22399 | IslandPath-DIMOB |        | Cys6-1_00732 | 1242539 | 1242628 | -1 | hypothetical protein                                         |
| 1227591 | 1249990 | 22399 | IslandPath-DIMOB |        | Cys6-1_00733 | 1242659 | 1242979 | -1 | hypothetical protein                                         |
| 1227591 | 1249990 | 22399 | IslandPath-DIMOB |        | Cys6-1_00734 | 1243368 | 1244282 | -1 | hypothetical protein                                         |

|         |         |       |                  |        |              |         |         |    |                                            |
|---------|---------|-------|------------------|--------|--------------|---------|---------|----|--------------------------------------------|
| 1227591 | 1249990 | 22399 | IslandPath-DIMOB | hchA   | Cys6-1_00735 | 1244283 | 1244960 | -1 | Molecular chaperone Hsp31 and glyoxalase 3 |
| 1227591 | 1249990 | 22399 | IslandPath-DIMOB |        | Cys6-1_00736 | 1244957 | 1245274 | -1 | hypothetical protein                       |
| 1227591 | 1249990 | 22399 | IslandPath-DIMOB | ceo    | Cys6-1_00737 | 1245749 | 1246678 | -1 | N(5)-(carboxyethyl)ornithine synthase      |
| 1227591 | 1249990 | 22399 | IslandPath-DIMOB |        | Cys6-1_00738 | 1247055 | 1247606 | -1 | Stress response regulator gls24            |
| 1227591 | 1249990 | 22399 | IslandPath-DIMOB |        | Cys6-1_00739 | 1247627 | 1247815 | -1 | hypothetical protein                       |
| 1227591 | 1249990 | 22399 | IslandPath-DIMOB |        | Cys6-1_00740 | 1247825 | 1248385 | -1 | hypothetical protein                       |
| 1227591 | 1249990 | 22399 | IslandPath-DIMOB |        | Cys6-1_00741 | 1248415 | 1248654 | -1 | hypothetical protein                       |
| 1227591 | 1249990 | 22399 | IslandPath-DIMOB | dkgB   | Cys6-1_00742 | 1249148 | 1249990 | 1  | 2,5-diketo-D-gluconic acid reductase B     |
| 1621554 | 1640004 | 18450 | IslandPath-DIMOB | arlR_2 | Cys6-1_01063 | 1621554 | 1622246 | -1 | Response regulator ArlR                    |
| 1621554 | 1640004 | 18450 | IslandPath-DIMOB |        | Cys6-1_01064 | 1622402 | 1622932 | -1 | hypothetical protein                       |
| 1621554 | 1640004 | 18450 | IslandPath-DIMOB | rpmE2  | Cys6-1_01065 | 1623063 | 1623308 | -1 | 50S ribosomal protein L31 type B           |
| 1621554 | 1640004 | 18450 | IslandPath-DIMOB |        | Cys6-1_01066 | 1623464 | 1623928 | -1 | hypothetical protein                       |
| 1621554 | 1640004 | 18450 | IslandPath-DIMOB |        | Cys6-1_01067 | 1624010 | 1624372 | -1 | hypothetical protein                       |
| 1621554 | 1640004 | 18450 | IslandPath-DIMOB |        | Cys6-1_01068 | 1624857 | 1625387 | -1 | hypothetical protein                       |
| 1621554 | 1640004 | 18450 | IslandPath-DIMOB | ypbG   | Cys6-1_01069 | 1625448 | 1626284 | -1 | putative protein YpbG                      |
| 1621554 | 1640004 | 18450 | IslandPath-DIMOB |        | Cys6-1_01070 | 1626935 | 1627330 | 1  | hypothetical protein                       |
| 1621554 | 1640004 | 18450 | IslandPath-DIMOB |        | Cys6-1_01071 | 1627999 | 1628268 | -1 | hypothetical protein                       |
| 1621554 | 1640004 | 18450 | IslandPath-DIMOB |        | Cys6-1_01072 | 1628589 | 1628837 | 1  | hypothetical protein                       |

|         |         |       |                  |  |              |         |         |    |                      |
|---------|---------|-------|------------------|--|--------------|---------|---------|----|----------------------|
| 1621554 | 1640004 | 18450 | IslandPath-DIMOB |  | Cys6-1_01073 | 1629847 | 1630218 | 1  | hypothetical protein |
| 1621554 | 1640004 | 18450 | IslandPath-DIMOB |  | Cys6-1_01074 | 1630468 | 1630653 | -1 | hypothetical protein |
| 1621554 | 1640004 | 18450 | IslandPath-DIMOB |  | Cys6-1_01076 | 1630891 | 1631169 | -1 | hypothetical protein |
| 1621554 | 1640004 | 18450 | IslandPath-DIMOB |  | Cys6-1_01080 | 1632233 | 1633018 | -1 | hypothetical protein |
| 1621554 | 1640004 | 18450 | IslandPath-DIMOB |  | Cys6-1_01081 | 1633075 | 1633293 | -1 | hypothetical protein |
| 1621554 | 1640004 | 18450 | IslandPath-DIMOB |  | Cys6-1_01082 | 1633306 | 1633527 | -1 | hypothetical protein |
| 1621554 | 1640004 | 18450 | IslandPath-DIMOB |  | Cys6-1_01083 | 1633543 | 1634292 | -1 | hypothetical protein |
| 1621554 | 1640004 | 18450 | IslandPath-DIMOB |  | Cys6-1_01084 | 1634395 | 1635126 | -1 | hypothetical protein |
| 1621554 | 1640004 | 18450 | IslandPath-DIMOB |  | Cys6-1_01085 | 1635605 | 1635844 | -1 | hypothetical protein |
| 1621554 | 1640004 | 18450 | IslandPath-DIMOB |  | Cys6-1_01086 | 1635962 | 1636231 | 1  | hypothetical protein |
| 1621554 | 1640004 | 18450 | IslandPath-DIMOB |  | Cys6-1_01087 | 1636352 | 1636507 | 1  | hypothetical protein |
| 1621554 | 1640004 | 18450 | IslandPath-DIMOB |  | Cys6-1_01088 | 1636727 | 1637113 | 1  | hypothetical protein |
| 1621554 | 1640004 | 18450 | IslandPath-DIMOB |  | Cys6-1_01089 | 1637290 | 1637853 | 1  | hypothetical protein |
| 1621554 | 1640004 | 18450 | IslandPath-DIMOB |  | Cys6-1_01090 | 1637883 | 1637981 | -1 | hypothetical protein |
| 1621554 | 1640004 | 18450 | IslandPath-DIMOB |  | Cys6-1_01091 | 1637990 | 1638232 | -1 | hypothetical protein |
| 1621554 | 1640004 | 18450 | IslandPath-DIMOB |  | Cys6-1_01092 | 1638204 | 1638407 | -1 | hypothetical protein |
| 1621554 | 1640004 | 18450 | IslandPath-DIMOB |  | Cys6-1_01093 | 1638870 | 1639016 | 1  | hypothetical protein |
| 1621554 | 1640004 | 18450 | IslandPath-DIMOB |  | Cys6-1_01094 | 1639230 | 1639535 | 1  | hypothetical protein |



|         |         |       |                  |        |              |         |         |    |                                       |
|---------|---------|-------|------------------|--------|--------------|---------|---------|----|---------------------------------------|
| 1621554 | 1640004 | 18450 | IslandPath-DIMOB | xerD_2 | Cys6-1_01095 | 1639576 | 1640004 | 1  | Tyrosine recombinase XerD             |
| 2058525 | 2078210 | 19685 | IslandPath-DIMOB |        | Cys6-1_02054 | 2058525 | 2058848 | -1 | hypothetical protein                  |
| 2058525 | 2078210 | 19685 | IslandPath-DIMOB | bltD   | Cys6-1_02053 | 2058896 | 2059357 | -1 | Spermine/spermidine acetyltransferase |
| 2058525 | 2078210 | 19685 | IslandPath-DIMOB |        | Cys6-1_02052 | 2059556 | 2060062 | -1 | hypothetical protein                  |
| 2058525 | 2078210 | 19685 | IslandPath-DIMOB |        | Cys6-1_02051 | 2060154 | 2060486 | -1 | hypothetical protein                  |
| 2058525 | 2078210 | 19685 | IslandPath-DIMOB |        | Cys6-1_02050 | 2060615 | 2060941 | -1 | hypothetical protein                  |
| 2058525 | 2078210 | 19685 | IslandPath-DIMOB |        | Cys6-1_02049 | 2061513 | 2062094 | -1 | hypothetical protein                  |
| 2058525 | 2078210 | 19685 | IslandPath-DIMOB |        | Cys6-1_02048 | 2062142 | 2062678 | -1 | hypothetical protein                  |
| 2058525 | 2078210 | 19685 | IslandPath-DIMOB |        | Cys6-1_02047 | 2062708 | 2063601 | -1 | hypothetical protein                  |
| 2058525 | 2078210 | 19685 | IslandPath-DIMOB |        | Cys6-1_02046 | 2063613 | 2064455 | -1 | hypothetical protein                  |
| 2058525 | 2078210 | 19685 | IslandPath-DIMOB |        | Cys6-1_02045 | 2064464 | 2064790 | -1 | hypothetical protein                  |
| 2058525 | 2078210 | 19685 | IslandPath-DIMOB |        | Cys6-1_02044 | 2064777 | 2064968 | -1 | hypothetical protein                  |
| 2058525 | 2078210 | 19685 | IslandPath-DIMOB |        | Cys6-1_02043 | 2064952 | 2065215 | -1 | hypothetical protein                  |
| 2058525 | 2078210 | 19685 | IslandPath-DIMOB |        | Cys6-1_02042 | 2065212 | 2065454 | -1 | hypothetical protein                  |
| 2058525 | 2078210 | 19685 | IslandPath-DIMOB |        | Cys6-1_02041 | 2065486 | 2065764 | -1 | hypothetical protein                  |
| 2058525 | 2078210 | 19685 | IslandPath-DIMOB |        | Cys6-1_02040 | 2065767 | 2065991 | -1 | hypothetical protein                  |
| 2058525 | 2078210 | 19685 | IslandPath-DIMOB |        | Cys6-1_02039 | 2065988 | 2066506 | -1 | hypothetical protein                  |
| 2058525 | 2078210 | 19685 | IslandPath-DIMOB |        | Cys6-1_02038 | 2066516 | 2066683 | -1 | hypothetical protein                  |

|         |         |       |                  |        |              |         |         |    |                           |
|---------|---------|-------|------------------|--------|--------------|---------|---------|----|---------------------------|
| 2058525 | 2078210 | 19685 | IslandPath-DIMOB |        | Cys6-1_02037 | 2066747 | 2067451 | -1 | hypothetical protein      |
| 2058525 | 2078210 | 19685 | IslandPath-DIMOB |        | Cys6-1_02036 | 2067627 | 2067821 | -1 | hypothetical protein      |
| 2058525 | 2078210 | 19685 | IslandPath-DIMOB |        | Cys6-1_02035 | 2067972 | 2068568 | 1  | hypothetical protein      |
| 2058525 | 2078210 | 19685 | IslandPath-DIMOB |        | Cys6-1_02034 | 2068562 | 2068795 | -1 | hypothetical protein      |
| 2058525 | 2078210 | 19685 | IslandPath-DIMOB |        | Cys6-1_02033 | 2069427 | 2069585 | 1  | hypothetical protein      |
| 2058525 | 2078210 | 19685 | IslandPath-DIMOB |        | Cys6-1_02032 | 2069698 | 2069928 | 1  | hypothetical protein      |
| 2058525 | 2078210 | 19685 | IslandPath-DIMOB |        | Cys6-1_02031 | 2070140 | 2070559 | 1  | hypothetical protein      |
| 2058525 | 2078210 | 19685 | IslandPath-DIMOB |        | Cys6-1_02030 | 2070730 | 2071164 | 1  | hypothetical protein      |
| 2058525 | 2078210 | 19685 | IslandPath-DIMOB |        | Cys6-1_02029 | 2071259 | 2071462 | 1  | hypothetical protein      |
| 2058525 | 2078210 | 19685 | IslandPath-DIMOB |        | Cys6-1_02028 | 2071585 | 2071986 | 1  | hypothetical protein      |
| 2058525 | 2078210 | 19685 | IslandPath-DIMOB |        | Cys6-1_02027 | 2072200 | 2072433 | 1  | hypothetical protein      |
| 2058525 | 2078210 | 19685 | IslandPath-DIMOB |        | Cys6-1_02026 | 2072512 | 2073630 | 1  | hypothetical protein      |
| 2058525 | 2078210 | 19685 | IslandPath-DIMOB |        | Cys6-1_02025 | 2073712 | 2073918 | 1  | hypothetical protein      |
| 2058525 | 2078210 | 19685 | IslandPath-DIMOB |        | Cys6-1_02024 | 2074236 | 2074589 | 1  | hypothetical protein      |
| 2058525 | 2078210 | 19685 | IslandPath-DIMOB |        | Cys6-1_02023 | 2075389 | 2075796 | 1  | hypothetical protein      |
| 2058525 | 2078210 | 19685 | IslandPath-DIMOB |        | Cys6-1_02022 | 2075896 | 2076414 | 1  | hypothetical protein      |
| 2058525 | 2078210 | 19685 | IslandPath-DIMOB |        | Cys6-1_02021 | 2076459 | 2076764 | 1  | hypothetical protein      |
| 2058525 | 2078210 | 19685 | IslandPath-DIMOB | xerD_3 | Cys6-1_02020 | 2077029 | 2078210 | 1  | Tyrosine recombinase XerD |

|         |         |      |          |  |              |         |         |    |                      |
|---------|---------|------|----------|--|--------------|---------|---------|----|----------------------|
| 1223353 | 1228766 | 5413 | SIGI-HMM |  | Cys6-1_00716 | 1223353 | 1225290 | -1 | hypothetical protein |
| 1223353 | 1228766 | 5413 | SIGI-HMM |  | Cys6-1_00718 | 1227591 | 1228766 | -1 | hypothetical protein |
| 1223353 | 1228766 | 5413 | SIGI-HMM |  | Cys6-1_00719 | 1228744 | 1230033 | -1 | hypothetical protein |

**Table S4.** Antibiotic susceptibility of the *L. lactis* UTNCys6-1 strain

| Antimicrobial E-test strip   | MIC (mg/L) | Susceptibility* | EFSA cut-off values (mg/L) <i>Lactococcus</i> [EFSA, 2012]** |
|------------------------------|------------|-----------------|--------------------------------------------------------------|
| Amoxicillin                  | 0.5        | S               | 4                                                            |
| Amoxicillin: clavulanic acid | 0.016      | S               | 4                                                            |
| Ampicillin                   | 0.5        | S               | 2                                                            |
| Cefotaxime                   | 0.002      | S               | 16                                                           |
| Erythromycin                 | 2          | S               | 1                                                            |
| Gentamycin                   | 48         | R               | 32                                                           |
| Penicillin                   | 0.25       | S               | 0.25                                                         |
| Tetracycline                 | 32         | S               | 32                                                           |

\* Susceptible (S): a bacterial strain is defined as susceptible when it is inhibited at a concentration of a specific antimicrobial equal to or lower than the established cut-off value ( $S \leq x \text{ mg / L}$ ). Resistant (R): a bacterial strain is defined as resistant when it is not inhibited at a concentration of a specific antimicrobial above the established cut-off value ( $R > x \text{ mg / L}$ ). \*\* MIC reference for *Lactococcus*.

**Table S5.** A. Summary of the biosynthetic gene clusters, type and metabolic compounds detected with antiSMASH in the A) UTNCys6-1 genome; B. *L. lactis* ATCC11474 genome.

A.

| Sample<br>contig | Reference                    | RiPP-Type             | Similarity<br>score | Product    | Compound(s)                                                                                                           | Organism                                                               |
|------------------|------------------------------|-----------------------|---------------------|------------|-----------------------------------------------------------------------------------------------------------------------|------------------------------------------------------------------------|
|                  | MiBIG<br>cluster             |                       |                     |            |                                                                                                                       |                                                                        |
| contig<br>1.1    | <a href="#">BGC0000554.1</a> | Betalactone           | 0.16                | RiPP       | SRO15-3108                                                                                                            | <i>Streptomyces filamentosus</i> NRRL 15998                            |
|                  | <a href="#">BGC0001579.1</a> |                       | 0.16                | RiPP       | duramycin                                                                                                             | <i>Streptomyces cinnamoneus</i>                                        |
|                  | <a href="#">BGC0000501.1</a> |                       | 0.16                | RiPP       | catenulipectin                                                                                                        | <i>Catenulispora acidiphila</i> DSM 44928                              |
|                  | <a href="#">BGC0002049.1</a> |                       | 0.16                | RiPP       | microviridin N9, microviridin N8, microviridin N7, microviridin N6, microviridin N5, microviridin N4, microviridin N3 | <i>Nostoc punctiforme</i> PCC 73102                                    |
|                  | <a href="#">BGC0000617.1</a> |                       | 0.15                | RiPP       | coagulin                                                                                                              | <i>Bacillus coagulans</i>                                              |
|                  | <a href="#">BGC0000558.1</a> |                       | 0.15                | RiPP       | sublancin 168                                                                                                         | <i>Bacillus subtilis</i> subsp. <i>subtilis</i> str. 168               |
|                  | <a href="#">BGC0000571.1</a> |                       | 0.15                | RiPP       | burhizin                                                                                                              | <i>Paraburkholderia rhizoxinica</i> HK1 454                            |
|                  | <a href="#">BGC0001494.1</a> |                       | 0.15                | RiPP       | acinetodin                                                                                                            | <i>Acinetobacter gyllenbergii</i> CIP 110306                           |
|                  | <a href="#">BGC0001850.1</a> |                       | 0.15                | Other      | diazaquinomycin A, diazaquinomycin E, diazaquinomycin F, diazaquinomycin G                                            | <i>Streptomyces</i> sp. F001                                           |
|                  | <a href="#">BGC0000548.1</a> |                       | 0.14                | RiPP       | salivaricin A                                                                                                         | <i>Streptococcus salivarius</i>                                        |
| contig<br>1.2    | <a href="#">BGC0000535.1</a> | Lanthipeptide-class-I | 0.88                | RiPP       | nisin A                                                                                                               | <i>Lactococcus lactis</i> subsp. <i>lactis</i>                         |
|                  | <a href="#">BGC0000538.1</a> |                       | 0.79                | RiPP       | nisin Z                                                                                                               | <i>Lactococcus lactis</i>                                              |
|                  | <a href="#">BGC0000536.1</a> |                       | 0.63                | RiPP       | nisin Q                                                                                                               | <i>Lactococcus lactis</i>                                              |
|                  | <a href="#">BGC0001789.1</a> |                       | 0.49                | RiPP       | suicin 90-1330                                                                                                        | <i>Streptococcus suis</i>                                              |
|                  | <a href="#">BGC0000537.1</a> |                       | 0.45                | RiPP       | nisin U                                                                                                               | <i>Streptococcus uberis</i>                                            |
|                  | <a href="#">BGC0000549.1</a> |                       | 0.35                | RiPP       | salivaricin D                                                                                                         | <i>Streptococcus salivarius</i>                                        |
|                  | <a href="#">BGC0001289.1</a> |                       | 0.34                | RiPP       | penisin                                                                                                               | <i>Paenibacillus ehimensis</i>                                         |
|                  | <a href="#">BGC0000544.1</a> |                       | 0.3                 | RiPP       | Planosporicin                                                                                                         | <i>Planomonospora alba</i>                                             |
|                  | <a href="#">BGC0000560.1</a> |                       | 0.27                | RiPP       | subtilomycin                                                                                                          | <i>Bacillus subtilis</i>                                               |
|                  | <a href="#">BGC0000528.1</a> |                       | 0.25                | RiPP       | michiganin A                                                                                                          | <i>Clavibacter michiganensis</i> subsp. <i>michiganensis</i> NCPPB 382 |
| contig<br>1.3    | <a href="#">BGC0000286.1</a> | T3PKS                 | 0.23                | Polyketide | viguiepinol                                                                                                           | <i>Streptomyces</i> sp. KO-3988                                        |
|                  | <a href="#">BGC0000764.1</a> |                       | 0.2                 | Saccharide | exopolysaccharide                                                                                                     | <i>Lactococcus lactis</i>                                              |

|            |                              |          |      |                           |                                                                                                                                                                          |                                                      |
|------------|------------------------------|----------|------|---------------------------|--------------------------------------------------------------------------------------------------------------------------------------------------------------------------|------------------------------------------------------|
|            | <a href="#">BGC0000867.1</a> |          | 0.18 | Other                     | polyhydroxyalkanoic acids                                                                                                                                                | <i>Ectothiorhodospira shaposhnikovii</i>             |
|            | <a href="#">BGC0000866.1</a> |          | 0.17 | Other                     | polyhydroxyalkanoate                                                                                                                                                     | <i>Burkholderia</i> sp. DSM 9242                     |
|            | <a href="#">BGC0001120.1</a> |          | 0.16 | NRP,<br>Polyketide        | burkholderic acid                                                                                                                                                        | <i>Burkholderia thailandensis</i> E264               |
|            | <a href="#">BGC0001080.1</a> |          | 0.14 | Other                     | endophenazine A, endophenazine B                                                                                                                                         | <i>Streptomyces anulatus</i>                         |
|            | <a href="#">BGC0001076.1</a> |          | 0.14 | Other                     | liposidomycin B, liposidomycin A, liposidomycin C, liposidomycin Z, liposidomycin H, liposidomycin G, liposidomycin L, liposidomycin M, liposidomycin K, liposidomycin N | <i>Streptomyces</i> sp. SN-1061M                     |
|            | <a href="#">BGC0000872.1</a> |          | 0.14 | Other                     | A-90289 A, A-90289 B                                                                                                                                                     | <i>Streptomyces</i> sp. SANK 60405                   |
|            | <a href="#">BGC0000934.1</a> |          | 0.14 | Other                     | 5-acetyl-5,10-dihydrophenazine-1-carboxylic acid, 5-(2-hydroxyacetyl)-5,10-dihydrophenazine-1-carboxylic acid, endophenazine A1, endophenazine F, endophenazine G        | <i>Kitasatospora</i> sp. HKI 714                     |
| contig 2.1 | <a href="#">BGC0001535.1</a> | RaS-RiPP | 0.23 | Other                     | branched-chain fatty acids                                                                                                                                               | <i>Streptomyces filamentosus</i>                     |
|            | <a href="#">BGC0001534.1</a> |          | 0.19 | Other                     | branched-chain fatty acids                                                                                                                                               | <i>Streptomyces filamentosus</i>                     |
|            | <a href="#">BGC0001229.1</a> |          | 0.17 | RiPP                      | SBI-06990 A1, SBI-06989 A2                                                                                                                                               | <i>Streptomyces bingchenggensis</i> BCW-1            |
|            | <a href="#">BGC0000897.1</a> |          | 0.17 | Other                     | dehydrophos                                                                                                                                                              | <i>Streptomyces luridus</i>                          |
|            | <a href="#">BGC0000497.1</a> |          | 0.17 | RiPP                      | BHT-A $\alpha$ , BHT-A $\beta$                                                                                                                                           | <i>Streptococcus ratti</i>                           |
|            | <a href="#">BGC0001356.1</a> |          | 0.16 | RiPP                      | paeniodin                                                                                                                                                                | <i>Paenibacillus dendritiformis</i> C454             |
|            | <a href="#">BGC0000540.1</a> |          | 0.16 | RiPP                      | paenibacillin                                                                                                                                                            | <i>Paenibacillus polymyxa</i> OSY-DF                 |
|            | <a href="#">BGC0001889.1</a> |          | 0.16 | RiPP                      | fusilassin                                                                                                                                                               | <i>Thermobifida fusca</i> YX                         |
|            | <a href="#">BGC0001645.1</a> |          | 0.16 | RiPP                      | lagmysin                                                                                                                                                                 | <i>Streptomyces</i> sp. NRRL S-118                   |
|            | <a href="#">BGC0001618.1</a> |          | 0.16 | RiPP                      | hyicin 3682                                                                                                                                                              | <i>Staphylococcus hyicus</i>                         |
| contig 5.1 | <a href="#">BGC0001209.1</a> | RaS-RiPP | 0.28 | RiPP                      | streptide                                                                                                                                                                | <i>Streptococcus thermophilus</i> LMD-9              |
|            | <a href="#">BGC0000902.1</a> |          | 0.17 | Other                     | flaviolin                                                                                                                                                                | <i>Saccharopolyspora erythraea</i> NRRL 2338         |
|            | <a href="#">BGC0000285.1</a> |          | 0.14 | Polyketide,<br>Saccharide | flaviolin rhamnoside, 3,3'-diflaviolin, flaviolin                                                                                                                        | <i>Saccharopolyspora erythraea</i>                   |
|            | <a href="#">BGC0000559.1</a> |          | 0.13 | RiPP                      | subtilin                                                                                                                                                                 | <i>Bacillus subtilis</i> subsp. spizizenii ATCC 6633 |
|            | <a href="#">BGC0000938.1</a> |          | 0.11 | Other                     | fosfomycin                                                                                                                                                               | <i>Streptomyces fradiae</i>                          |
|            | <a href="#">BGC0000511.1</a> |          | 0.11 | RiPP                      | ericin S                                                                                                                                                                 | <i>Bacillus subtilis</i>                             |

|  |                              |  |      |            |                                                      |                                 |
|--|------------------------------|--|------|------------|------------------------------------------------------|---------------------------------|
|  | <a href="#">BGC0000343.1</a> |  | 0.08 | NRP        | enterobactin                                         | <i>Pseudomonas sp. J465</i>     |
|  | <a href="#">BGC0001650.1</a> |  | 0.08 | NRP        | Le-pyrrolopyrazines                                  | <i>Lysobacter enzymogenes</i>   |
|  | <a href="#">BGC0001895.1</a> |  | 0.08 | Polyketide | huanglongmycin A, huanglongmycin B, huanglongmycin C | <i>Streptomyces sp. CB09001</i> |
|  | <a href="#">BGC0000949.1</a> |  | 0.07 | NRP        | A-500359 A, A-500359 B                               | <i>Streptomyces griseus</i>     |

## B.

| Sample contig | Reference                    | RiPP-Type | Similarity score | Product            | Compound(s)                                                                                                                                                              | Organism                                    |
|---------------|------------------------------|-----------|------------------|--------------------|--------------------------------------------------------------------------------------------------------------------------------------------------------------------------|---------------------------------------------|
|               | MiBIG cluster                |           |                  |                    |                                                                                                                                                                          |                                             |
| Region 1.1    | <a href="#">BGC0000286.1</a> | T3PKS     | 0.23             | Polyketide         | viguiepinol                                                                                                                                                              | <i>Streptomyces sp. KO-3988</i>             |
|               | <a href="#">BGC0000764.1</a> |           | 0.2              | Saccharide         | exopolysaccharide                                                                                                                                                        | <i>Lactococcus lactis</i>                   |
|               | <a href="#">BGC0000867.1</a> |           | 0.18             | Other              | polyhydroxyalkanoic acids                                                                                                                                                | <i>Ectothiorhodospira shaposhnikovii</i>    |
|               | <a href="#">BGC0000866.1</a> |           | 0.17             | Other              | polyhydroxyalkanoate                                                                                                                                                     | <i>Burkholderia sp. DSM 9242</i>            |
|               | <a href="#">BGC0001863.1</a> |           | 0.15             | RiPP, Terpene      | bacillicin CER074                                                                                                                                                        | <i>Bacillus mycoides</i>                    |
|               | <a href="#">BGC0001080.1</a> |           | 0.14             | Other (Phenazine)  | endophenazine A, endophenazine B                                                                                                                                         | <i>Streptomyces anulatus</i>                |
|               | <a href="#">BGC0001104.1</a> |           | 0.14             | NRP, Polyketide    | myxovirescin A1                                                                                                                                                          | <i>Myxococcus xanthus</i> DK 1622           |
|               | <a href="#">BGC0001076.1</a> |           | 0.14             | Other (Nucleoside) | liposidomycin B, liposidomycin A, liposidomycin C, liposidomycin Z, liposidomycin H, liposidomycin G, liposidomycin L, liposidomycin M, liposidomycin K, liposidomycin N | <i>Streptomyces sp. SN-1061M</i>            |
|               | <a href="#">BGC0000872.1</a> |           | 0.14             | Other              | A-90289 A, A-90289 B                                                                                                                                                     | <i>Streptomyces sp. SANK 60405</i>          |
|               | <a href="#">BGC0000530.1</a> |           | 0.14             | RiPP               | mutacin B-Ny266                                                                                                                                                          | <i>Streptococcus mutans</i> N66             |
| Region 1.2    | <a href="#">BGC0001209.1</a> | RaS-RiPP  | 0.22             | RiPP               | streptide                                                                                                                                                                | <i>Streptococcus thermophilus</i> LMD-9     |
|               | <a href="#">BGC0000488.1</a> |           | 0.17             | RiPP               | circularin A                                                                                                                                                             | <i>Clostridium beijerinckii</i>             |
|               | <a href="#">BGC0000554.1</a> |           | 0.16             | RiPP               | SRO15-3108                                                                                                                                                               | <i>Streptomyces filamentosus</i> NRRL 15998 |

|            |                              |                                         |      |                           |                                                                            |                                                          |
|------------|------------------------------|-----------------------------------------|------|---------------------------|----------------------------------------------------------------------------|----------------------------------------------------------|
|            | <a href="#">BGC0000616.1</a> |                                         | 0.16 | RiPP                      | amylocyclicin                                                              | <i>Bacillus velezensis</i> FZB42                         |
|            | <a href="#">BGC0000487.1</a> |                                         | 0.16 | RiPP                      | carnocyclin                                                                | <i>Carnobacterium maltaromaticum</i>                     |
|            | <a href="#">BGC0001494.1</a> |                                         | 0.16 | RiPP                      | acinetodin                                                                 | <i>Acinetobacter gyllenbergii</i> CIP 110306             |
|            | <a href="#">BGC0000513.1</a> |                                         | 0.16 | RiPP                      | Ery-9, Ery-6, Ery-8, Ery-7, Ery-5, Ery-4, Ery-3                            | <i>Saccharopolyspora erythraea</i> NRRL 2338             |
|            | <a href="#">BGC0000558.1</a> |                                         | 0.16 | RiPP                      | sublancin 168                                                              | <i>Bacillus subtilis</i> subsp. <i>subtilis</i> str. 168 |
| Region 1.3 | <a href="#">BGC0000535.1</a> | <b>Lanthipeptides: putative class I</b> | 1    | RiPP                      | nisin A                                                                    | <i>Lactococcus lactis</i> subsp. <i>lactis</i>           |
|            | <a href="#">BGC0000538.1</a> |                                         | 0.71 | RiPP                      | nisin Z                                                                    | <i>Lactococcus lactis</i>                                |
|            | <a href="#">BGC0000536.1</a> |                                         | 0.63 | RiPP                      | nisin Q                                                                    | <i>Lactococcus lactis</i>                                |
|            | <a href="#">BGC0001789.1</a> |                                         | 0.49 | RiPP                      | suicin 90-1330                                                             | <i>Streptococcus suis</i>                                |
|            | <a href="#">BGC0000537.1</a> |                                         | 0.46 | RiPP                      | nisin U                                                                    | <i>Streptococcus uberis</i>                              |
|            | <a href="#">BGC0000549.1</a> |                                         | 0.35 | RiPP                      | salivaricin D                                                              | <i>Streptococcus salivarius</i>                          |
|            | <a href="#">BGC0001289.1</a> |                                         | 0.34 | RiPP                      | penisin                                                                    | <i>Paenibacillus ehimensis</i>                           |
|            | <a href="#">BGC0000544.1</a> |                                         | 0.3  | RiPP                      | planosporicin                                                              | <i>Planomonospora alba</i>                               |
|            | <a href="#">BGC0000560.1</a> |                                         | 0.28 | RiPP                      | subtilomycin                                                               | <i>Bacillus subtilis</i>                                 |
| Region 1.4 | <a href="#">BGC0001521.1</a> | <b>Betalactone</b>                      | 0.17 | NRP                       | auriculamide                                                               | <i>Herpetosiphon aurantiacus</i> DSM 785                 |
|            | <a href="#">BGC0000554.1</a> |                                         | 0.16 | RiPP                      | SRO15-3108                                                                 | <i>Streptomyces filamentosus</i> NRRL 15998              |
|            | <a href="#">BGC0001579.1</a> |                                         | 0.16 | RiPP                      | duramycin                                                                  | <i>Streptomyces cinnamoneus</i>                          |
|            | <a href="#">BGC0000558.1</a> |                                         | 0.15 | RiPP                      | sublancin 168                                                              | <i>Bacillus subtilis</i> subsp. <i>subtilis</i> str. 168 |
|            | <a href="#">BGC0000501.1</a> |                                         | 0.15 | RiPP                      | catenulipectin                                                             | <i>Catenulispora acidiphila</i> DSM 44928                |
|            | <a href="#">BGC0000617.1</a> |                                         | 0.15 | RiPP                      | coagulin                                                                   | <i>Bacillus coagulans</i>                                |
|            | <a href="#">BGC0000571.1</a> |                                         | 0.15 | RiPP                      | burhizin                                                                   | <i>Paraburkholderia rhizoxinica</i> HKI 454              |
|            | <a href="#">BGC0001494.1</a> |                                         | 0.15 | RiPP                      | acinetodin                                                                 | <i>Acinetobacter gyllenbergii</i> CIP 110306             |
|            | <a href="#">BGC0001850.1</a> |                                         | 0.15 | Other (Shikimate-derived) | diazaquinomycin A, diazaquinomycin E, diazaquinomycin F, diazaquinomycin G | <i>Streptomyces</i> sp. F001                             |

|            |                              |           |      |                 |                                                                                                                                                      |                                          |
|------------|------------------------------|-----------|------|-----------------|------------------------------------------------------------------------------------------------------------------------------------------------------|------------------------------------------|
|            | <a href="#">BGC0000548.1</a> |           | 0.15 | RiPP            | salivaricin A                                                                                                                                        | <i>Streptococcus salivarius</i>          |
| Region 1.5 | <a href="#">BGC0000887.1</a> | RiPP-Type | 0.15 | Alkaloid        | saxitoxin, gonyautoxin 2, gonyautoxin 3, toxin C2, toxin C3, gonyautoxin 5, decarbamoylsaxitoxin, decarbamoylgonyautoxin 2, decarbamoylgonyautoxin 3 | <i>Dolichospermum circinale</i> AWQC131C |
|            | <a href="#">BGC0000928.1</a> |           | 0.14 | Other           | T3 toxin                                                                                                                                             | <i>Cylindrospermopsis raciborskii</i> T3 |
|            | <a href="#">BGC0000188.1</a> |           | 0.14 | Alkaloid        | saxitoxin, neosaxitoxin, decarbamoylsaxitoxin, gonyautoxin 3, gonyautoxin 2                                                                          | <i>Cylindrospermopsis raciborskii</i> T3 |
|            | <a href="#">BGC0000207.1</a> |           | 0.14 | Polyketide      | chartreusin                                                                                                                                          | <i>Streptomyces chartreusis</i>          |
|            | <a href="#">BGC0001547.1</a> |           | 0.13 | Terpene         | citreoahybridonol                                                                                                                                    | <i>Aspergillus stellatus</i>             |
|            | <a href="#">BGC0000631.1</a> |           | 0.08 | Terpene         | botrydial                                                                                                                                            | <i>Botrytis cinerea</i> B05.10           |
|            | <a href="#">BGC0000507.1</a> |           | 0.07 | RiPP            | epicidin                                                                                                                                             | <i>Staphylococcus epidermidis</i>        |
|            | <a href="#">BGC0001926.1</a> |           | 0.05 | Polyketide      | chrodrimanin B                                                                                                                                       | <i>Talaromyces verruculosus</i>          |
|            | <a href="#">BGC0002002.1</a> |           | 0.05 | NRP             | 1,6-phenazinedimethanol, fontizine A                                                                                                                 | <i>Serratia fonticola</i>                |
|            | <a href="#">BGC0001591.1</a> |           | 0.05 | Other           | fatty acid enol ester                                                                                                                                | uncultured bacterium CSLC2               |
| Region 1.6 | <a href="#">BGC0001534.1</a> | RaS-RiPP  | 0.19 | Other           | branched-chain fatty acids                                                                                                                           | <i>Streptomyces filamentosus</i>         |
|            | <a href="#">BGC0001535.1</a> |           | 0.17 | Other           | branched-chain fatty acids                                                                                                                           | <i>Streptomyces filamentosus</i>         |
|            | <a href="#">BGC0000620.1</a> |           | 0.15 | RiPP            | lacticin Q                                                                                                                                           | <i>Lactococcus lactis</i>                |
|            | <a href="#">BGC0001628.1</a> |           | 0.1  | NRP             | JBIR-78, JBIR-95                                                                                                                                     | <i>Kibdelosporangium</i> sp. AK-AA56     |
|            | <a href="#">BGC0000700.1</a> |           | 0.1  | Saccharide      | istamycin                                                                                                                                            | <i>Streptomyces tenjimariensis</i>       |
|            | <a href="#">BGC0000111.1</a> |           | 0.09 | Polyketide      | neocarzilin A, neocarzilin B                                                                                                                         | <i>Streptomyces carzinostaticus</i>      |
|            | <a href="#">BGC0001567.1</a> |           | 0.08 | NRP             | cysteoamide                                                                                                                                          | <i>Streptomyces lincolnensis</i>         |
|            | <a href="#">BGC0000185.1</a> |           | 0.08 | Polyketide      | tartrolon                                                                                                                                            | <i>Teredinibacter turnerae</i> T7901     |
|            | <a href="#">BGC0001737.1</a> |           | 0.08 | NRP, Polyketide | phenalamide                                                                                                                                          | <i>Corallococcus coralloides</i>         |



|               |                              |                 |      |                          |                    |                                         |
|---------------|------------------------------|-----------------|------|--------------------------|--------------------|-----------------------------------------|
|               | <a href="#">BGC0001394.1</a> |                 | 0.08 | NRP, Polyketide          | phenalamide A2     | <i>Myxococcus stipitatus</i> DSM 14675  |
| Region<br>1.7 | <a href="#">BGC0001209.1</a> | <b>RaS-RiPP</b> | 0.24 | RiPP                     | streptide          | <i>Streptococcus thermophilus</i> LMD-9 |
|               | <a href="#">BGC0001929.1</a> |                 | 0.21 | RiPP                     | WGK                | <i>Streptococcus ferus</i>              |
|               | <a href="#">BGC0000780.1</a> |                 | 0.15 | Saccharide               | O&K-antigen        | <i>Vibrio parahaemolyticus</i>          |
|               | <a href="#">BGC0000779.1</a> |                 | 0.15 | Saccharide               | lipopolysaccharide | <i>Aeromonas piscicola</i>              |
|               | <a href="#">BGC0000938.1</a> |                 | 0.13 | Other<br>(Aminocoumarin) | fosfomycin         | <i>Streptomyces fradiae</i>             |
|               | <a href="#">BGC0000343.1</a> |                 | 0.07 | NRP                      | enterobactin       | <i>Pseudomonas</i> sp. J465             |
|               | <a href="#">BGC0000982.1</a> |                 | 0.06 | NRP, Polyketide          | cystothiazole A    | <i>Cystobacter fuscus</i>               |
|               | <a href="#">BGC0001055.1</a> |                 | 0.05 | NRP, Polyketide          | yersiniabactin     | <i>Escherichia coli</i>                 |
|               | <a href="#">BGC0000806.1</a> |                 | 0.05 | Saccharide               | phosphonoglycans   | <i>Glycomyces</i> sp. NRRL B-16210      |

**Table S6.** Genomes used for pangenome analysis

| GenBank (Genome Assembly)             | Strain                                                                        | Isolation source |
|---------------------------------------|-------------------------------------------------------------------------------|------------------|
| <u>GCA_016406265.1 (ASM1640626v1)</u> | <i>Lactococcus lactis</i> strain WiKim0098                                    | Kimchi           |
| <u>GCA_002148215.1 (ASM214821v1)</u>  | <i>Lactococcus lactis</i> subsp. <i>lactis</i> bv. <i>Diacetylactis</i> FM03  | Cheese           |
| <u>GCA_000468955.1 (ASM46895v1)</u>   | <i>Lactococcus lactis</i> subsp. <i>cremoris</i> KW2                          | Plant            |
| <u>GCA_001456525.1 (ASM145652v1)</u>  | <i>Lactococcus lactis</i> subsp. <i>lactis</i> K337                           | kimchi           |
| <u>GCA_001456385.1 (ASM145638v1)</u>  | <i>Lactococcus lactis</i> subsp. <i>lactis</i> ATCC19437                      | dairy            |
| <u>GCA_001456615.1 (ASM145661v1)</u>  | <i>Lactococcus lactis</i> subsp. <i>lactis</i> KF282                          | mustard          |
| <u>GCA_002078975.2 (ASM207897v2)</u>  | <i>Lactococcus lactis</i> subsp. <i>lactis</i> UC06                           | dairy            |
| <u>GCA_003176835.1 (ASM317683v1)</u>  | <i>Lactococcus lactis</i> subsp. <i>lactis</i> 14B4                           | almonds          |
| <u>GCA_000447905.1 (LLDT2.01)</u>     | <i>Lactococcus lactis</i> subsp. <i>lactis</i> bv. <i>diacetylactis</i> TIFN2 | cheese           |
| <u>GCA_000478255.2 (ASM47825v2)</u>   | <i>Lactococcus lactis</i> subsp. <i>lactis</i> NCDO 2118                      | frozen peas      |
| <u>GCA_015476255.1 (ASM1547625v1)</u> | <i>Lactococcus lactis</i> subsp. <i>lactis</i> L19                            | intestine fish   |
